# Supplementary material for: Assessing the Dermal Penetration Efficacy of Chemical Compounds with the Ex-Vivo Porcine Ear Model
Source: MDPI journal article supplement (doi:10.3390/pharmaceutics14030678), 2022-03-19
Supplement: s1 [file s1]

# Supplementary Materials: Assessing the Dermal Penetration Efficacy of Chemical Compounds with the Ex-Vivo Porcine Ear Model

Cornelia M. Keck \*, Ayat Abdelkader, Olga Pelikh, Sabrina Wiemann, Vasudha Kaushik, David Specht, Ralph W. Eckert, Reem M. Alnemari, Henriette Dietrich and Jana Brüßler

## Supplementary material – Section S1

The macro used for the determination of the AF-dermis was:

```
makeRectangle(30, 1302, 1866, 80);
run("Crop");
run("Measure");
```

## Supplementary material – Section S2

**Table S1:** All images were subjected to an automated threshold algorithms. Five different algorithms were programmed (A1-5) with ImageJ software. Each algorithm consisted of two macros that were run subsequently. A1 was used for Cur-NS and Cur-Gel, A2 for Dil-NLC, A3 for the smartFilms, A4 for the Cur-NLC and A5 for the CF-Gel (cf. Table 1 in the original manuscript).

| A1                                                                                                                                                                                                                                                                                                                                                                                                                              | A2                                                                                                                                                                                                                                                                                                                                                                                                                              | A3                                                                                                                                                                                                                                                                                                                                                                                                                            | A4                                                                                                                                                                                                                                                                                                                                                                                                                              | A5                                                                                                                                                                                                                                                                                                                                                                                                                            |
|---------------------------------------------------------------------------------------------------------------------------------------------------------------------------------------------------------------------------------------------------------------------------------------------------------------------------------------------------------------------------------------------------------------------------------|---------------------------------------------------------------------------------------------------------------------------------------------------------------------------------------------------------------------------------------------------------------------------------------------------------------------------------------------------------------------------------------------------------------------------------|-------------------------------------------------------------------------------------------------------------------------------------------------------------------------------------------------------------------------------------------------------------------------------------------------------------------------------------------------------------------------------------------------------------------------------|---------------------------------------------------------------------------------------------------------------------------------------------------------------------------------------------------------------------------------------------------------------------------------------------------------------------------------------------------------------------------------------------------------------------------------|-------------------------------------------------------------------------------------------------------------------------------------------------------------------------------------------------------------------------------------------------------------------------------------------------------------------------------------------------------------------------------------------------------------------------------|
| Macro 1                                                                                                                                                                                                                                                                                                                                                                                                                         |                                                                                                                                                                                                                                                                                                                                                                                                                                 |                                                                                                                                                                                                                                                                                                                                                                                                                               |                                                                                                                                                                                                                                                                                                                                                                                                                                 |                                                                                                                                                                                                                                                                                                                                                                                                                               |
| // Color Thresholder<br>1.52a<br><br>// Autogenerated<br>macro, single images<br>only!<br><br>min=newArray(3);<br>max=newArray(3);<br>filter=newArray(3);<br>a=getTitle();<br>run("RGB Stack");<br>run("Convert Stack to<br>Images");<br>selectWindow("Red");<br>rename("0");<br>selectWindow("Green");<br>rename("1");<br>selectWindow("Blue");<br>rename("2");<br>min[0]=33;<br>max[0]=255;<br>filter[0]="pass";<br>min[1]=0; | // Color Thresholder<br>1.53a<br><br>// Autogenerated<br>macro, single images<br>only!<br><br>min=newArray(3);<br>max=newArray(3);<br>filter=newArray(3);<br>a=getTitle();<br>run("RGB Stack");<br>run("Convert Stack to<br>Images");<br>selectWindow("Red");<br>rename("0");<br>selectWindow("Green");<br>rename("1");<br>selectWindow("Blue");<br>rename("2");<br>min[0]=80;<br>max[0]=255;<br>filter[0]="pass";<br>min[1]=0; | // Color Thresholder<br>1.52a<br><br>// Autogenerated<br>macro, single images<br>only!<br><br>min=newArray(3);<br>max=newArray(3);<br>filter=newArray(3);<br>a=getTitle();<br>run("RGB Stack");<br>run("Convert Stack to<br>Images");<br>selectWindow("Red");<br>rename("0");<br>selectWindow("Green");<br>rename("1");<br>selectWindow("Blue");<br>rename("2");<br>min[0]=0;<br>max[0]=0;<br>filter[0]="stop";<br>min[1]=33; | // Color Thresholder<br>1.53a<br><br>// Autogenerated<br>macro, single images<br>only!<br><br>min=newArray(3);<br>max=newArray(3);<br>filter=newArray(3);<br>a=getTitle();<br>run("RGB Stack");<br>run("Convert Stack to<br>Images");<br>selectWindow("Red");<br>rename("0");<br>selectWindow("Green");<br>rename("1");<br>selectWindow("Blue");<br>rename("2");<br>min[0]=33;<br>max[0]=255;<br>filter[0]="pass";<br>min[1]=0; | // Color Thresholder<br>1.53a<br><br>// Autogenerated<br>macro, single images<br>only!<br><br>min=newArray(3);<br>max=newArray(3);<br>filter=newArray(3);<br>a=getTitle();<br>run("RGB Stack");<br>run("Convert Stack to<br>Images");<br>selectWindow("Red");<br>rename("0");<br>selectWindow("Green");<br>rename("1");<br>selectWindow("Blue");<br>rename("2");<br>min[0]=0;<br>max[0]=0;<br>filter[0]="stop";<br>min[1]=60; |

|                                                                                                                                                                                                                                                                                                                                                                                                                                                                                                                           |                                                                                                                                                                                                                                                                                                                                                                                                                                                                                                                             |                                                                                                                                                                                                                                                                                                                                                                                                                                                                                                                             |                                                                                                                                                                                                                                                                                                                                                                                                                                                                                                                             |                                                                                                                                                                                                                                                                                                                                                                                                                                                                                                                             |
|---------------------------------------------------------------------------------------------------------------------------------------------------------------------------------------------------------------------------------------------------------------------------------------------------------------------------------------------------------------------------------------------------------------------------------------------------------------------------------------------------------------------------|-----------------------------------------------------------------------------------------------------------------------------------------------------------------------------------------------------------------------------------------------------------------------------------------------------------------------------------------------------------------------------------------------------------------------------------------------------------------------------------------------------------------------------|-----------------------------------------------------------------------------------------------------------------------------------------------------------------------------------------------------------------------------------------------------------------------------------------------------------------------------------------------------------------------------------------------------------------------------------------------------------------------------------------------------------------------------|-----------------------------------------------------------------------------------------------------------------------------------------------------------------------------------------------------------------------------------------------------------------------------------------------------------------------------------------------------------------------------------------------------------------------------------------------------------------------------------------------------------------------------|-----------------------------------------------------------------------------------------------------------------------------------------------------------------------------------------------------------------------------------------------------------------------------------------------------------------------------------------------------------------------------------------------------------------------------------------------------------------------------------------------------------------------------|
| <pre> max[1]=0; filter[1]="stop"; min[2]=0; max[2]=0; filter[2]="stop"; for (i=0;i&lt;3;i++){     selectWindow(""+i);     setThreshold(min[i], max[i]);     run("Convert    to Mask");     if  (filter[i]=="stop") run("Invert"); } imageCalculator("AND create", "0","1"); imageCalculator("AND create",  "Result  of 0","2"); for (i=0;i&lt;3;i++){     selectWindow(""+i);     close(); } selectWindow("Result of 0"); close(); selectWindow("Result of Result of 0"); rename(a); // Colour Thresholding- ----- </pre> | <pre> max[1]=255; filter[1]="pass"; min[2]=0; max[2]=0; filter[2]="stop"; for (i=0;i&lt;3;i++){     selectWindow(""+i);     setThreshold(min[i], max[i]);     run("Convert    to Mask");     if  (filter[i]=="stop") run("Invert"); } imageCalculator("AND create", "0","1"); imageCalculator("AND create",  "Result  of 0","2"); for (i=0;i&lt;3;i++){     selectWindow(""+i);     close(); } selectWindow("Result of 0"); close(); selectWindow("Result of Result of 0"); rename(a); // Colour Thresholding- ----- </pre> | <pre> max[1]=255; filter[1]="pass"; min[2]=0; max[2]=0; filter[2]="stop"; for (i=0;i&lt;3;i++){     selectWindow(""+i);     setThreshold(min[i], max[i]);     run("Convert    to Mask");     if  (filter[i]=="stop") run("Invert"); } imageCalculator("AND create", "0","1"); imageCalculator("AND create",  "Result  of 0","2"); for (i=0;i&lt;3;i++){     selectWindow(""+i);     close(); } selectWindow("Result of 0"); close(); selectWindow("Result of Result of 0"); rename(a); // Colour Thresholding- ----- </pre> | <pre> max[1]=255; filter[1]="pass"; min[2]=0; max[2]=0; filter[2]="stop"; for (i=0;i&lt;3;i++){     selectWindow(""+i);     setThreshold(min[i], max[i]);     run("Convert    to Mask");     if  (filter[i]=="stop") run("Invert"); } imageCalculator("AND create", "0","1"); imageCalculator("AND create",  "Result  of 0","2"); for (i=0;i&lt;3;i++){     selectWindow(""+i);     close(); } selectWindow("Result of 0"); close(); selectWindow("Result of Result of 0"); rename(a); // Colour Thresholding- ----- </pre> | <pre> max[1]=255; filter[1]="pass"; min[2]=0; max[2]=0; filter[2]="stop"; for (i=0;i&lt;3;i++){     selectWindow(""+i);     setThreshold(min[i], max[i]);     run("Convert    to Mask");     if  (filter[i]=="stop") run("Invert"); } imageCalculator("AND create", "0","1"); imageCalculator("AND create",  "Result  of 0","2"); for (i=0;i&lt;3;i++){     selectWindow(""+i);     close(); } selectWindow("Result of 0"); close(); selectWindow("Result of Result of 0"); rename(a); // Colour Thresholding- ----- </pre> |
| <b>Macro 2</b>                                                                                                                                                                                                                                                                                                                                                                                                                                                                                                            |                                                                                                                                                                                                                                                                                                                                                                                                                                                                                                                             |                                                                                                                                                                                                                                                                                                                                                                                                                                                                                                                             |                                                                                                                                                                                                                                                                                                                                                                                                                                                                                                                             |                                                                                                                                                                                                                                                                                                                                                                                                                                                                                                                             |
| run("Invert");                                                                                                                                                                                                                                                                                                                                                                                                                                                                                                            | run("Invert");                                                                                                                                                                                                                                                                                                                                                                                                                                                                                                              | run("Invert");                                                                                                                                                                                                                                                                                                                                                                                                                                                                                                              | run("Invert");                                                                                                                                                                                                                                                                                                                                                                                                                                                                                                              | run("Invert");                                                                                                                                                                                                                                                                                                                                                                                                                                                                                                              |

## Supplementary material – Section S3

**Table S2:** Influence of porcine ear age on penetration efficacy for the six different formulations tested (cf. table 2). A= fresh ears, B= ears stored for 24-36h, C= ears stored for 48-60h, D = frozen and on demand defrosted ears. Data obtained from the different trials (week 1-3) are shown as mean  $\pm$  SE in separate lines to visualize the variations in parameters caused by post-slaughter age of the ears (A-C) and by the different time points of testing (trials 1-3 = week 1-3).

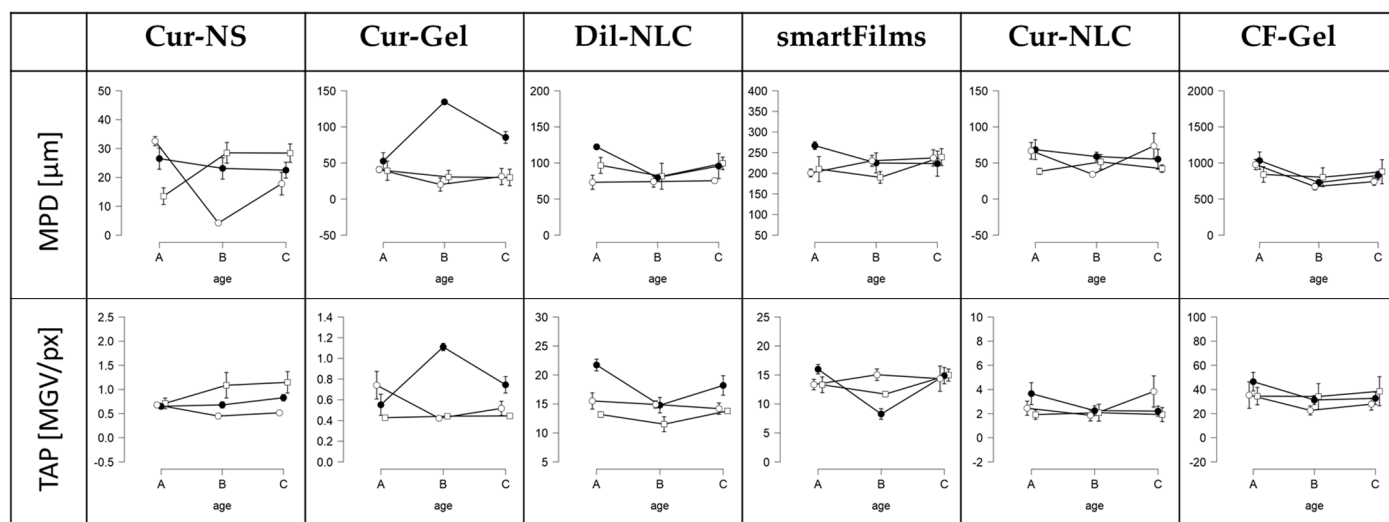

○ data trial 1 ● data trial 2 □ data trial 3

## Supplementary material – Section S4

**Table S3.** Influence of porcine ear age on penetration efficacy for the Cur-Gel. A= fresh ears, B = ears stored for 24-36h, C= ears stored for 48-60h, D = frozen and on demand defrosted ears. A: original data from Fig. 4 comprising the MPD and TAP data for the Cur-Gel from all ears tested (33 biopsies treated with Cur-Gel in total). B: data after exclusion of data from two ears (2 from 33) that led to extremely high penetration values (cf. text). After elimination of the data, the trend is similar to the other formulations tested (the use of B-ears results in lower penetration efficacy).

|                       | A: Cur-Gel<br>original data                                                                                                                                                                                                                                                                                                                                      | B: Cur-Gel<br>after exclusion of data from two ears<br>with extremely high values |                       |   |      |   |       |   |       |   |      |                                                                                                                                                                                                                                                                                                                                                                    |       |                       |   |      |   |       |   |       |   |      |
|-----------------------|------------------------------------------------------------------------------------------------------------------------------------------------------------------------------------------------------------------------------------------------------------------------------------------------------------------------------------------------------------------|-----------------------------------------------------------------------------------|-----------------------|---|------|---|-------|---|-------|---|------|--------------------------------------------------------------------------------------------------------------------------------------------------------------------------------------------------------------------------------------------------------------------------------------------------------------------------------------------------------------------|-------|-----------------------|---|------|---|-------|---|-------|---|------|
| MPD [ $\mu\text{m}$ ] | 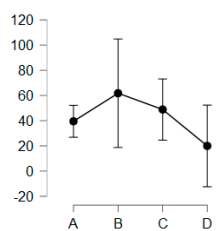 <table><caption>MPD [<math>\mu\text{m}</math>] - Original Data (A)</caption><tr><th>Group</th><th>MPD [<math>\mu\text{m}</math>]</th></tr><tr><td>A</td><td>~40</td></tr><tr><td>B</td><td>~60</td></tr><tr><td>C</td><td>~50</td></tr><tr><td>D</td><td>~20</td></tr></table> | Group                                                                             | MPD [ $\mu\text{m}$ ] | A | ~40  | B | ~60   | C | ~50   | D | ~20  |  <table><caption>MPD [<math>\mu\text{m}</math>] - Excluded Data (B)</caption><tr><th>Group</th><th>MPD [<math>\mu\text{m}</math>]</th></tr><tr><td>A</td><td>~40</td></tr><tr><td>B</td><td>~25</td></tr><tr><td>C</td><td>~50</td></tr><tr><td>D</td><td>~20</td></tr></table> | Group | MPD [ $\mu\text{m}$ ] | A | ~40  | B | ~25   | C | ~50   | D | ~20  |
| Group                 | MPD [ $\mu\text{m}$ ]                                                                                                                                                                                                                                                                                                                                            |                                                                                   |                       |   |      |   |       |   |       |   |      |                                                                                                                                                                                                                                                                                                                                                                    |       |                       |   |      |   |       |   |       |   |      |
| A                     | ~40                                                                                                                                                                                                                                                                                                                                                              |                                                                                   |                       |   |      |   |       |   |       |   |      |                                                                                                                                                                                                                                                                                                                                                                    |       |                       |   |      |   |       |   |       |   |      |
| B                     | ~60                                                                                                                                                                                                                                                                                                                                                              |                                                                                   |                       |   |      |   |       |   |       |   |      |                                                                                                                                                                                                                                                                                                                                                                    |       |                       |   |      |   |       |   |       |   |      |
| C                     | ~50                                                                                                                                                                                                                                                                                                                                                              |                                                                                   |                       |   |      |   |       |   |       |   |      |                                                                                                                                                                                                                                                                                                                                                                    |       |                       |   |      |   |       |   |       |   |      |
| D                     | ~20                                                                                                                                                                                                                                                                                                                                                              |                                                                                   |                       |   |      |   |       |   |       |   |      |                                                                                                                                                                                                                                                                                                                                                                    |       |                       |   |      |   |       |   |       |   |      |
| Group                 | MPD [ $\mu\text{m}$ ]                                                                                                                                                                                                                                                                                                                                            |                                                                                   |                       |   |      |   |       |   |       |   |      |                                                                                                                                                                                                                                                                                                                                                                    |       |                       |   |      |   |       |   |       |   |      |
| A                     | ~40                                                                                                                                                                                                                                                                                                                                                              |                                                                                   |                       |   |      |   |       |   |       |   |      |                                                                                                                                                                                                                                                                                                                                                                    |       |                       |   |      |   |       |   |       |   |      |
| B                     | ~25                                                                                                                                                                                                                                                                                                                                                              |                                                                                   |                       |   |      |   |       |   |       |   |      |                                                                                                                                                                                                                                                                                                                                                                    |       |                       |   |      |   |       |   |       |   |      |
| C                     | ~50                                                                                                                                                                                                                                                                                                                                                              |                                                                                   |                       |   |      |   |       |   |       |   |      |                                                                                                                                                                                                                                                                                                                                                                    |       |                       |   |      |   |       |   |       |   |      |
| D                     | ~20                                                                                                                                                                                                                                                                                                                                                              |                                                                                   |                       |   |      |   |       |   |       |   |      |                                                                                                                                                                                                                                                                                                                                                                    |       |                       |   |      |   |       |   |       |   |      |
| TAP [MGV/pixel]       |  <table><caption>TAP [MGV/pixel] - Original Data (A)</caption><tr><th>Group</th><th>TAP [MGV/pixel]</th></tr><tr><td>A</td><td>~0.6</td></tr><tr><td>B</td><td>~0.65</td></tr><tr><td>C</td><td>~0.55</td></tr><tr><td>D</td><td>~0.5</td></tr></table>                        | Group                                                                             | TAP [MGV/pixel]       | A | ~0.6 | B | ~0.65 | C | ~0.55 | D | ~0.5 |  <table><caption>TAP [MGV/pixel] - Excluded Data (B)</caption><tr><th>Group</th><th>TAP [MGV/pixel]</th></tr><tr><td>A</td><td>~0.6</td></tr><tr><td>B</td><td>~0.45</td></tr><tr><td>C</td><td>~0.55</td></tr><tr><td>D</td><td>~0.5</td></tr></table>                        | Group | TAP [MGV/pixel]       | A | ~0.6 | B | ~0.45 | C | ~0.55 | D | ~0.5 |
| Group                 | TAP [MGV/pixel]                                                                                                                                                                                                                                                                                                                                                  |                                                                                   |                       |   |      |   |       |   |       |   |      |                                                                                                                                                                                                                                                                                                                                                                    |       |                       |   |      |   |       |   |       |   |      |
| A                     | ~0.6                                                                                                                                                                                                                                                                                                                                                             |                                                                                   |                       |   |      |   |       |   |       |   |      |                                                                                                                                                                                                                                                                                                                                                                    |       |                       |   |      |   |       |   |       |   |      |
| B                     | ~0.65                                                                                                                                                                                                                                                                                                                                                            |                                                                                   |                       |   |      |   |       |   |       |   |      |                                                                                                                                                                                                                                                                                                                                                                    |       |                       |   |      |   |       |   |       |   |      |
| C                     | ~0.55                                                                                                                                                                                                                                                                                                                                                            |                                                                                   |                       |   |      |   |       |   |       |   |      |                                                                                                                                                                                                                                                                                                                                                                    |       |                       |   |      |   |       |   |       |   |      |
| D                     | ~0.5                                                                                                                                                                                                                                                                                                                                                             |                                                                                   |                       |   |      |   |       |   |       |   |      |                                                                                                                                                                                                                                                                                                                                                                    |       |                       |   |      |   |       |   |       |   |      |
| Group                 | TAP [MGV/pixel]                                                                                                                                                                                                                                                                                                                                                  |                                                                                   |                       |   |      |   |       |   |       |   |      |                                                                                                                                                                                                                                                                                                                                                                    |       |                       |   |      |   |       |   |       |   |      |
| A                     | ~0.6                                                                                                                                                                                                                                                                                                                                                             |                                                                                   |                       |   |      |   |       |   |       |   |      |                                                                                                                                                                                                                                                                                                                                                                    |       |                       |   |      |   |       |   |       |   |      |
| B                     | ~0.45                                                                                                                                                                                                                                                                                                                                                            |                                                                                   |                       |   |      |   |       |   |       |   |      |                                                                                                                                                                                                                                                                                                                                                                    |       |                       |   |      |   |       |   |       |   |      |
| C                     | ~0.55                                                                                                                                                                                                                                                                                                                                                            |                                                                                   |                       |   |      |   |       |   |       |   |      |                                                                                                                                                                                                                                                                                                                                                                    |       |                       |   |      |   |       |   |       |   |      |
| D                     | ~0.5                                                                                                                                                                                                                                                                                                                                                             |                                                                                   |                       |   |      |   |       |   |       |   |      |                                                                                                                                                                                                                                                                                                                                                                    |       |                       |   |      |   |       |   |       |   |      |
